# Supplementary material for: LMNA R527C mutation causes an inflammation driven progeria via triggering DNA-sensing pathways
Source: Research Square preprint supplement (doi:10.21203/rs.3.rs-1406652/v1), 2022-03-10
Supplement: Supplementary file 1 [file 32ffbb34dc6b99956c876ea9.xlsx]

## Sheet: Construct
Constructs name	Source
pGL3-Ifnb-promoter	This paper
pRL-TK	Promega, Cat# E2241
pCMV-HA	Addgene, Cat# 32530
pCMV-HA-LAP2α	This paper
pCMV-HA-BAF	This paper
pCMV-HA-BAF(A12T)	This paper
pCMV-3×FLAG-7.1	Addgene, Cat# 155021
pCMV-3×FLAG-Lamin A	This paper
pCMV-3×FLAG-Lamin A (R527C)	This paper
pCMV-3×FLAG-Lamin A (R527H)	This paper
pCMV-3×FLAG-Lamin A (R527P)	This paper
pCMV-3×FLAG-Lamin A (R101P)	This paper
pCMV-3×FLAG-Lamin A (R166P)	This paper
pCMV-3×FLAG-Lamin A (R435C)	This paper
pCMV-3×FLAG-Lamin A (R471C)	This paper
pCMV-3×FLAG-Lamin A (R541S)	This paper
pCMV-3×FLAG-Lamin A (V440M)	This paper
pCMV-3×FLAG-Lamin A (A529V)	This paper
pCMV-3×FLAG-Lamin A (M540I)	This paper
pCMV-3×FLAG-Lamin A (K542N)	This paper
pCMV-3×FLAG-Lamin A (S573L)	This paper
pCMV-3×FLAG-Lamin A (G592N)	This paper
pCMV-3×FLAG-Progerin	This paper
psPAX2	Addgene, Cat# 12260
pCMV-VSV-G	Addgene, Cat# 8454
pCDH-CMV-MCS-EF1α-puro	This paper
pCDH-GFP-Lamin A	This paper
pCDH-GFP-Lamin A (R527C)	This paper
pCDH-GFP-Lamin A (1-390)	This paper
pCDH-GFP-Lamin A (1-425)	This paper
pCDH-GFP-Lamin A (390-646)	This paper
pCDH-GFP-Lamin A (425-646)	This paper
pCDH-Flag-Lamin A	This paper
pCDH-Flag-Lamin A (R527C)	This paper
pCDH-Flag-Progerin	This paper
pNDamMyc	Addgene, Cat# 59217
pCDH-Dam-Lamin A	This paper
pCDH-Dam-Lamin A (R527C)	This paper
pCMV-Flag-STING	This paper
pCMV-HA-cGAS	This paper
lentiCRISPR v2	Addgene, Cat# 52961
lentiCRISPR-sgLAP2	This paper
lentiCRISPR-sgBANF1	This paper
lentiCRISPR-sgLMNA	This paper
lentiCRISPR-sgCgas	This paper
lentiCRISPR-sgAim2	This paper
Episomal iPSC Reprogramming Vectors	Invitrogen, Cat# A14703
pET21d-Lamin A	This paper
pET21d-Lamin A (R527C)	This paper
