# Supplementary material for: LMNA R527C mutation causes an inflammation driven progeria via triggering DNA-sensing pathways
Source: Research Square preprint supplement (doi:10.21203/rs.3.rs-1406652/v1), 2022-03-10
Supplement: Supplementary file 2 [file 508c5738c0b4cfc5e6e1ac9d.xlsx]

## Sheet: Primer
AdR-top	CTAATACGACTCACTATAGGGCAGCGTGGTCGCGGCCGAGGA
AdR-bottom	TCCTCGGCCG
AdR-PCR	GGTCGCGGCCGAGGATC
Guide RNA
Gene	guide RNA sequence (5’—3’)
Human LMNA	GGAGCTCAATGATCGCTTGG
	CATCGACCGTGTGCGCTCGC
Human BANF1	GTGGGGAGCCTGGCTGGGAT
	CTTCGTGGCAGAGCCCATGG
Human TMPO	TTGGTGCCGGCGGGGAGCGG
	CGGCGGCGGCCCCAGAGCCG
Murine Aim2	GCTCTCTTAACAACGTTATT
	AGAAGTCTGTCCTCAAGCTA
Murine Cgas	AAACGGCTCTCGTCTTAGAT
	TGCTAACAACTTATCGAAGC
Genotyping
Genotyping Primers for Lmna R527C mutant mice
Primer	Sequence 5’—3’
WT Lmna-F	TAGGAGTGCCCTCCCTTAATG
R527C Lmna-F	TCGCTTCCCACCGAAGTTCA
Lmna-R	GAAGCTTCGAGTGACTGTGAC
Genotyping Primers for Aim2 KO mice
Primer	Sequence 5’—3’
WT Aim2-F	GCTGCTCTGCTGATTTCCTC
KO Aim2-F	CCAGTGTTTCTCAACTGTACTGCTAT
Aim2-R	TTGGAGACAGACTCTGGTGAAG
Genotyping Primers for Cgas KO mice
Primer	Sequence 5’—3’
Cgas-F	TGGTATCTATCCTCAGGCACA
Cgas-R	ATCCCCAATACCTGGGACAA
RT-PCR
Gene	Primer (5’-3’)
Murine 36b4	TTGTGCAAAGGGCTGAGACT
	GTCACTCAACAGCAGCCTGA
Murine 36b5	CGGTTTGTTTGGGTTTGGGTTTGGGTTTGGGTTTGGGTT
	GGCTTGCCTTACCCTTACCCTTACCCTTACCCTTACCCT
Murine 36b6	ATGCTCCCCGGGCTGTAT
	CATAGGAGTCCTTCTGACCCATTC
Murine 36b7	GGAAATCACCATGCCCTCTAC
	CCTTGTGGCTGTCTTTGTGAG
Murine 36b8	TCATGCTGTTCTGCTACGGG
	GCAGGAAGACAAGGACGACA
Murine 36b9	TGGACACCCTACTTTGCTGC
	TCCGGGTGTGGTAAAACAGG
Murine 36b10	GTCCTTAACCTAGGCATCTTCG
	TCTGTTGCAGTAAATGGTCTCG
Murine 36b11	CAGCAAGTGGGAAGGTGTAATCC
	CCCATTCTATCATCAACGGGTACAA
Murine 36b12	GGTTTTTGAGGGTGAGGGTGAGGGTGAGGGTGAGGGT
	TCCCGACTATCCCTATCCCTATCCCTATCCCTATCCCTA
